# Supplementary material for: Laparoscopy versus Open Nephroureterectomy in Prognostic Outcome of Patients with Advanced Upper Tract Urothelial Cancer: A Retrospective, Multicenter, Propensity-Score Matching Analysis
Source: PubMed Central journal article supplement — Cancer Res Treat. 2018 Oct 12;51(3):963–72. doi: 10.4143/crt.2018.465 (PMC6639211; doi:10.4143/crt.2018.465), 2018-10-12
Supplement: crt-2018-465-suppl2.pdf [file crt-2018-465-suppl2.pdf]

**S2 Table.** Multivariate Cox regression analyses of risk factors for bladder recurrence in patients with T3-4 stage and in patients with lymph node positive

| Variable                      | Severe stage (T3, T4) data set |         |                        |         | Lymph node positive (pN1) data set |         |                      |         |
|-------------------------------|--------------------------------|---------|------------------------|---------|------------------------------------|---------|----------------------|---------|
|                               | Univariate                     |         | Multiple <sup>a)</sup> |         | Univariate                         |         | Multiple             |         |
|                               | HR (95% CI)                    | p-value | HR (95% CI)            | p-value | HR (95% CI)                        | p-value | HR (95% CI)          | p-value |
| <b>Bladder recurrence</b>     |                                |         |                        |         |                                    |         |                      |         |
| Operation                     |                                |         |                        |         |                                    |         |                      |         |
| ONU                           | 1 (Ref)                        |         | 1 (Ref)                |         | 1 (Ref)                            |         | 1 (Ref)              |         |
| LNU                           | 0.776 (0.592-1.015)            | 0.064   | 0.793 (0.602-1.045)    | 0.100   | 1.481 (0.683-3.211)                | 0.320   | 1.483 (0.683-3.219)  | 0.319   |
| Age (yr)                      | 1.014 (1.001-1.027)            | 0.041   |                        |         | 1.003 (0.961-1.048)                | 0.877   | -                    | -       |
| Sex                           |                                |         |                        |         |                                    |         |                      |         |
| Male                          | 1 (Ref)                        |         | 1 (Ref)                |         | 1 (Ref)                            |         | -                    | -       |
| Female                        | 0.689 (0.504-0.943)            | 0.020   | 1.012 (0.999-1.026)    | 0.075   | 0.482 (0.183-1.271)                | 0.140   | -                    | -       |
| BMI (kg/m <sup>2</sup> )      | 0.976 (0.936-1.017)            | 0.239   | -                      | -       | 0.992 (0.866-1.135)                | 0.903   | -                    | -       |
| ASA score                     |                                |         |                        |         |                                    |         |                      |         |
| 1                             | 1 (Ref)                        |         | -                      | -       | 1 (Ref)                            |         | -                    | -       |
| 2                             | 1.158 (0.849-1.580)            | 0.355   | -                      | -       | 1.422 (0.538-3.758)                | 0.478   | -                    | -       |
| 3                             | 1.495 (0.842-2.652)            | 0.170   | -                      | -       | 1.204 (0.140-10.366)               | 0.866   | -                    | -       |
| Unknown                       | 0.624 (0.195-1.998)            | 0.427   | -                      | -       | 1.759 (0.204-15.186)               | 0.607   | -                    | -       |
| Previous bladder cancer       |                                |         |                        |         |                                    |         |                      |         |
| No                            | 1 (Ref)                        |         | 1 (Ref)                |         | 1 (Ref)                            |         | 1 (Ref)              |         |
| Previous bladder tumor Hx.    | 1.555 (1.030-2.348)            | 0.036   | 0.725 (0.528-0.996)    | 0.047   | 2.606 (1.022-6.644)                | 0.045   | 2.580 (1.013-6.568)  | 0.047   |
| Concomitant bladder tumor Hx. | 1.778 (1.142-2.770)            | 0.011   | 1.478 (0.972-2.247)    | 0.068   | 3.976 (1.343-11.768)               | 0.013   | 4.010 (1.355-11.867) | 0.012   |



|                                  |                     |       |                     |       |                     |       |   |   |
|----------------------------------|---------------------|-------|---------------------|-------|---------------------|-------|---|---|
| pNx                              | 1 (Ref)             |       | -                   | -     | -                   | -     | - | - |
| pN0                              | 1.143 (0.869-1.504) | 0.339 | -                   | -     | -                   | -     | - | - |
| pN1                              | 0.804 (0.520-1.243) | 0.326 | -                   | -     | -                   | -     | - | - |
| <b>Concomitant LVI</b>           |                     |       |                     |       |                     |       |   |   |
| No                               | 1 (Ref)             |       | -                   | -     | 1 (Ref)             |       | - | - |
| Yes                              | 0.869 (0.662-1.140) | 0.310 | -                   | -     | 1.162 (0.539-2.504) | 0.702 | - | - |
| <b>Concomitant CIS</b>           |                     |       |                     |       |                     |       |   |   |
| No                               | 1 (Ref)             |       | -                   | -     | 1 (Ref)             |       | - | - |
| Yes                              | 1.015 (0.698-1.474) | 0.940 | -                   | -     | 0.938 (0.382-2.306) | 0.889 | - | - |
| <b>LN dissection</b>             |                     |       |                     |       |                     |       |   |   |
| Not performed                    | 1 (Ref)             |       | -                   | -     | -                   | -     | - | - |
| Performed                        | 1.052 (0.812-1.364) | 0.699 | -                   | -     | -                   | -     | - | - |
| <b>Adjuvant chemotherapy</b>     |                     |       |                     |       |                     |       |   |   |
| No                               | 1 (Ref)             |       | 1 (Ref)             |       | 1 (Ref)             |       | - | - |
| Yes                              | 0.741 (0.571-0.961) | 0.024 | 0.750 (0.572-0.983) | 0.037 | 1.301 (0.591-2.863) | 0.514 | - | - |
| <b>Progression-free survival</b> |                     |       |                     |       |                     |       |   |   |
| <b>Operation</b>                 |                     |       |                     |       |                     |       |   |   |
| ONU                              | 1 (Ref)             |       | 1 (Ref)             |       | 1 (Ref)             |       | - | - |
| LNU                              | 0.825 (0.656-1.038) | 0.101 | 1.003 (0.791-1.272) | 0.979 | 1.023 (0.630-1.662) | 0.927 | - | - |
| Age (yr)                         | 1.014 (1.003-1.025) | 0.015 | 1.010 (0.999-1.022) | 0.073 | 0.986 (0.962-1.011) | 0.266 | - | - |
| <b>Sex</b>                       |                     |       |                     |       |                     |       |   |   |
| Male                             | 1 (Ref)             |       | -                   | -     | 1 (Ref)             |       | - | - |
| Female                           | 1.004 (0.786-1.283) | 0.972 | -                   | -     | 0.988 (0.620-1.576) | 0.960 | - | - |
| BMI (kg/m <sup>2</sup> )         | 0.981 (0.947-1.016) | 0.290 | -                   | -     | 0.961 (0.887-1.041) | 0.328 | - | - |
| <b>ASA score</b>                 |                     |       |                     |       |                     |       |   |   |
| 1                                | 1 (Ref)             |       | -                   | -     | 1 (Ref)             |       | - | - |
| 2                                | 0.983 (0.763-1.268) | 0.897 | -                   | -     | 0.809 (0.495-1.322) | 0.398 | - | - |
| 3                                | 0.744 (0.414-1.335) | 0.321 | -                   | -     | 0.234 (0.031-1.741) | 0.156 | - | - |
| Unknown                          | 1.527 (0.792-2.945) | 0.206 | -                   | -     | 1.585 (0.543-4.628) | 0.399 | - | - |
| <b>Previous bladder</b>          |                     |       |                     |       |                     |       |   |   |

|                               |                     |       |                     |       |                       |       |   |   |
|-------------------------------|---------------------|-------|---------------------|-------|-----------------------|-------|---|---|
| cancer                        |                     |       |                     |       |                       |       |   |   |
| No                            | 1 (Ref)             |       | 1 (Ref)             |       | 1 (Ref)               |       | - | - |
| Previous bladder tumor Hx.    | 1.560 (1.112-2.188) | 0.010 | 1.278 (0.903-1.810) | 0.166 | 1.535 (0.895-2.632)   | 0.119 | - | - |
| Concomitant bladder tumor Hx. | 1.660 (1.148-2.401) | 0.007 | 1.703 (1.173-2.472) | 0.005 | 0.824 (0.332-2.048)   | 0.677 | - | - |
| Concomitant bladder cancer    |                     |       |                     |       |                       |       |   |   |
| No                            | 1 (Ref)             |       | -                   | -     | 1 (Ref)               |       | - | - |
| Yes                           | 1.576 (1.093-2.273) | 0.015 | -                   | -     | 0.764 (0.310-1.886)   | 0.560 | - | - |
| Tumor location                |                     |       |                     |       |                       |       |   |   |
| Renal pelvis                  | 1 (Ref)             |       | 1 (Ref)             |       | 1 (Ref)               |       | - | - |
| Ureter                        | 1.183 (0.921-1.520) | 0.187 | 1.039 (0.805-1.342) | 0.769 | 1.027 (0.640-1.649)   | 0.911 | - | - |
| Both renal pelvis and ureter  | 1.363 (1.020-1.820) | 0.036 | 1.142 (0.849-1.536) | 0.381 | 0.804 (0.454-1.424)   | 0.454 | - | - |
| Tumor grade                   |                     |       |                     |       |                       |       |   |   |
| I                             | 1 (Ref)             |       | -                   | -     | 1 (Ref)               |       | - | - |
| II                            | 0.187 (0.026-1.355) | 0.097 | -                   | -     | -                     | -     | - | - |
| III                           | 0.394 (0.055-2.819) | 0.354 | -                   | -     | 1.095 (0.513-2.339)   | 0.814 | - | - |
| Missing/unknown               | 0.328 (0.046-2.350) | 0.267 | -                   | -     | 1.222 (0.569-2.623)   | 0.607 | - | - |
| Tumor grade II                |                     |       |                     |       |                       |       |   |   |
| Low grade                     | 1 (Ref)             |       | 1 (Ref)             |       | 1 (Ref)               |       | - | - |
| High grade                    | 2.197 (1.396-3.459) | 0.001 | 1.681 (1.059-2.670) | 0.028 | 0.666 (0.288-2.025)   | 0.408 | - | - |
| Unknown                       | 0.316 (0.042-2.352) | 0.261 | 0.213 (0.028-1.596) | 0.133 | 0.269 (0.002-2.532)   | 0.384 | - | - |
| Pathological T category       |                     |       |                     |       |                       |       |   |   |
| pTis/pTa                      | -                   | -     | -                   | -     | 1 (Ref)               |       | - | - |
| pT1                           | -                   | -     | -                   | -     | 1.177 (0.063-171.787) | 0.922 | - | - |

|                                |                     |        |                     |        |                       |       |                     |       |
|--------------------------------|---------------------|--------|---------------------|--------|-----------------------|-------|---------------------|-------|
| pT2                            | -                   | -      | -                   | -      | 1.446 (0.184-186.411) | 0.803 | -                   | -     |
| pT3                            | -                   | -      | -                   | -      | 2.911 (0.419-367.295) | 0.460 | -                   | -     |
| pT4                            | -                   | -      | -                   | -      | 3.543 (0.439-458.493) | 0.393 | -                   | -     |
| Unknown                        | -                   | -      | -                   | -      | -                     | -     | -                   | -     |
| <b>Pathological N category</b> |                     |        |                     |        |                       |       |                     |       |
| pNx                            | 1 (Ref)             |        | 1 (Ref)             |        | -                     | -     | -                   | -     |
| pN0                            | 0.891 (0.689-1.152) | 0.379  | 0.838 (0.644-1.092) | 0.190  | -                     | -     | -                   | -     |
| pN1                            | 2.660 (2.010-3.520) | <0.001 | 1.914 (1.418-2.583) | <0.001 | -                     | -     | -                   | -     |
| <b>Concomitant LVI</b>         |                     |        |                     |        |                       |       |                     |       |
| No                             | 1 (Ref)             |        | 1 (Ref)             |        | 1 (Ref)               |       | -                   | -     |
| Yes                            | 2.272 (1.820-2.835) | <0.001 | 1.859 (1.464-2.360) | <0.001 | 1.548 (0.976-2.456)   | 0.063 | -                   | -     |
| <b>Concomitant CIS</b>         |                     |        |                     |        |                       |       |                     |       |
| No                             | 1 (Ref)             |        | -                   | -      | 1 (Ref)               |       | -                   | -     |
| Yes                            | 1.253 (0.928-1.691) | 0.141  | -                   | -      | 0.568 (0.320-1.010)   | 0.054 | -                   | -     |
| <b>LN dissection</b>           |                     |        |                     |        |                       |       |                     |       |
| Not performed                  | 1 (Ref)             |        | -                   | -      | -                     | -     | -                   | -     |
| Performed                      | 1.252 (1.003-1.563) | 0.047  | -                   | -      | -                     | -     | -                   | -     |
| <b>Adjuvant chemotherapy</b>   |                     |        |                     |        |                       |       |                     |       |
| No                             | 1 (Ref)             |        | -                   | -      | 1 (Ref)               |       | -                   | -     |
| Yes                            | 1.140 (0.914-1.421) | 0.245  | -                   | -      | 1.329 (0.842-2.096)   | 0.222 | -                   | -     |
| <b>Overall survival</b>        |                     |        |                     |        |                       |       |                     |       |
| <b>Operation</b>               |                     |        |                     |        |                       |       |                     |       |
| ONU                            | 1 (Ref)             |        | 1 (Ref)             |        | 1 (Ref)               |       | 1 (Ref)             |       |
| LNU                            | 0.749 (0.584-0.962) | 0.023  | 0.866 (0.670-1.120) | 0.273  | 0.620 (0.339-1.134)   | 0.120 | 0.658 (0.359-1.207) | 0.177 |
| Age (yr)                       | 1.032 (1.020-1.044) | <0.001 | 1.032 (1.019-1.045) | <0.001 | 1.011 (0.983-1.041)   | 0.430 | -                   | -     |

|                               |                     |        |                     |       |                     |       |   |   |  |
|-------------------------------|---------------------|--------|---------------------|-------|---------------------|-------|---|---|--|
| Sex                           |                     |        |                     |       |                     |       |   |   |  |
| Male                          | 1 (Ref)             |        | -                   | -     | 1 (Ref)             |       | - | - |  |
| Female                        | 0.871 (0.670-1.132) | 0.301  | -                   | -     | 1.020 (0.607-1.713) | 0.940 | - | - |  |
| BMI (kg/m <sup>2</sup> )      | 0.977 (0.942-1.014) | 0.215  | -                   | -     | 0.984 (0.900-1.076) | 0.721 | - | - |  |
| ASA score                     |                     |        |                     |       |                     |       |   |   |  |
| 1                             | 1 (Ref)             |        | 1 (Ref)             |       | 1 (Ref)             |       | - | - |  |
| 2                             | 1.248 (0.942-1.654) | 0.123  | 0.998 (0.743-1.339) | 0.987 | 0.879 (0.504-1.534) | 0.649 | - | - |  |
| 3                             | 1.279 (0.758-2.158) | 0.357  | 1.009 (0.585-1.742) | 0.974 | 0.342 (0.045-2.574) | 0.297 | - | - |  |
| Unknown                       | 2.890 (1.619-5.158) | <0.001 | 2.017 (1.118-3.641) | 0.020 | 2.471 (0.908-6.726) | 0.077 | - | - |  |
| Previous bladder cancer       |                     |        |                     |       |                     |       |   |   |  |
| No                            | 1 (Ref)             |        | 1 (Ref)             |       | 1 (Ref)             |       | - | - |  |
| Previous bladder tumor Hx.    | 1.644 (1.146-2.359) | 0.007  | 1.344 (0.933-1.938) | 0.113 | 1.715 (0.929-3.164) | 0.084 | - | - |  |
| Concomitant bladder tumor Hx. | 1.696 (1.158-2.483) | 0.007  | 1.680 (1.141-2.472) | 0.009 | 1.149 (0.459-2.879) | 0.767 | - | - |  |
| Concomitant bladder cancer    |                     |        |                     |       |                     |       |   |   |  |
| No                            | 1 (Ref)             |        | -                   | -     | 1 (Ref)             |       | - | - |  |
| Yes                           | 1.608 (1.101-2.348) | 0.014  | -                   | -     | 1.055 (0.424-2.621) | 0.909 | - | - |  |
| Tumor location                |                     |        |                     |       |                     |       |   |   |  |
| Renal pelvis                  | 1 (Ref)             |        | -                   | -     | 1 (Ref)             |       | - | - |  |
| Ureter                        | 1.177 (0.908-1.525) | 0.219  | -                   | -     | 1.067 (0.627-1.816) | 0.810 | - | - |  |
| Both renal pelvis and ureter  | 1.278 (0.948-1.724) | 0.107  | -                   | -     | 0.883 (0.478-1.631) | 0.691 | - | - |  |
| Tumor grade                   |                     |        |                     |       |                     |       |   |   |  |
| I                             | 1 (Ref)             |        | -                   | -     | 1 (Ref)             |       | - | - |  |
| II                            | 0.346 (0.048-2.498) | 0.293  | -                   | -     | -                   | -     | - | - |  |
| III                           | 0.484 (0.068-3.471) | 0.471  | -                   | -     | 0.916 (0.394-2.129) | 0.839 | - | - |  |
|                               | 0.567 (0.079-4.052) | 0.571  | -                   | -     | 1.651 (0.738-3.691) | 0.222 | - | - |  |

|                         |                     |        |                     |        |                       |       |                     |       |
|-------------------------|---------------------|--------|---------------------|--------|-----------------------|-------|---------------------|-------|
| Missing/unknown         |                     |        |                     |        |                       |       |                     |       |
| Tumor grade II          |                     |        |                     |        |                       |       |                     |       |
| Low grade               | 1 (Ref)             |        | 1 (Ref)             |        | 1 (Ref)               |       | -                   | -     |
| High grade              | 1.780 (1.179-2.686) | 0.006  | 1.448 (0.952-2.202) | 0.084  | 1.029 (0.403-3.741)   | 0.959 | -                   | -     |
| Unknown                 | 1.318 (0.504-3.444) | 0.573  | 1.011 (0.383-2.670) | 0.983  | 0.603 (0.004-6.274)   | 0.742 | -                   | -     |
| Pathological T category |                     |        |                     |        |                       |       |                     |       |
| pTis/pTa                | -                   | -      | -                   | -      | 1 (Ref)               |       | -                   | -     |
| pT1                     | -                   | -      | -                   | -      | 0.879 (0.047-128.689) | 0.939 | -                   | -     |
| pT2                     | -                   | -      | -                   | -      | 0.745 (0.088-97.266)  | 0.844 | -                   | -     |
| pT3                     | -                   | -      | -                   | -      | 1.906 (0.273-240.943) | 0.656 | -                   | -     |
| pT4                     | -                   | -      | -                   | -      | 3.513 (0.444-453.851) | 0.396 | -                   | -     |
| Unknown                 | -                   | -      | -                   | -      | -                     | -     | -                   | -     |
| Pathological N category |                     |        |                     |        |                       |       |                     |       |
| pNx                     | 1 (Ref)             |        | 1 (Ref)             |        | -                     | -     | -                   | -     |
| pN0                     | 1.138 (0.880-1.473) | 0.325  | 1.057 (0.810-1.381) | 0.682  | -                     | -     | -                   | -     |
| pN1                     | 2.625 (1.934-3.561) | <0.001 | 1.966 (1.418-2.726) | <0.001 | -                     | -     | -                   | -     |
| Concomitant LVI         |                     |        |                     |        |                       |       |                     |       |
| No                      | 1 (Ref)             |        | 1 (Ref)             |        | 1 (Ref)               |       | 1 (Ref)             |       |
| Yes                     | 2.247 (1.787-2.825) | <0.001 | 1.829 (1.430-2.338) | <0.001 | 1.852 (1.084-3.166)   | 0.024 | 1.789 (1.045-3.064) | 0.034 |
| Concomitant CIS         |                     |        |                     |        |                       |       |                     |       |
| No                      | 1 (Ref)             |        | -                   | -      | 1 (Ref)               |       | -                   | -     |
| Yes                     | 1.275 (0.930-1.748) | 0.131  | -                   | -      | 0.677 (0.363-1.261)   | 0.219 | -                   | -     |
| LN dissection           |                     |        |                     |        |                       |       |                     |       |
| Not performed           | 1 (Ref)             |        | -                   | -      | -                     |       | -                   | -     |





|                              |                     |       |                     |       |                       |        |                      |       |  |
|------------------------------|---------------------|-------|---------------------|-------|-----------------------|--------|----------------------|-------|--|
| bladder cancer               |                     |       |                     |       |                       |        |                      |       |  |
| No                           | 1 (Ref)             |       | -                   | -     | 1 (Ref)               |        | -                    | -     |  |
| Yes                          | 1.538 (1.016-2.326) | 0.042 | -                   | -     | 1.161 (0.625-2.157)   | 0.636  | -                    | -     |  |
| Tumor location               |                     |       |                     |       |                       |        |                      |       |  |
| Renal pelvis                 | 1 (Ref)             |       | -                   | -     | 1 (Ref)               |        | -                    | -     |  |
| Ureter                       | 1.168 (0.880-1.550) | 0.283 | -                   | -     | 1.183 (0.802-1.744)   | 0.397  | -                    | -     |  |
| Both renal pelvis and ureter | 1.315 (0.952-1.817) | 0.096 | -                   | -     | 1.339 (0.810-2.215)   | 0.255  | -                    | -     |  |
| Tumor grade                  |                     |       |                     |       |                       |        |                      |       |  |
| I                            | 1 (Ref)             |       | -                   | -     | 1 (Ref)               |        | -                    | -     |  |
| II                           | 0.307 (0.042-2.223) | 0.242 | -                   | -     | 3.435 (0.467-439.372) | 0.393  | -                    | -     |  |
| III                          | 0.447 (0.062-3.210) | 0.423 | -                   | -     | 4.530 (0.627-577.747) | 0.295  | -                    | -     |  |
| Missing/unknown              | 0.487 (0.068-3.494) | 0.474 | -                   | -     | 3.165 (0.462-399.934) | 0.420  | -                    | -     |  |
| Tumor grade II               |                     |       |                     |       |                       |        |                      |       |  |
| Low grade                    | 1 (Ref)             |       | 1 (Ref)             |       | 1 (Ref)               |        | 1 (Ref)              |       |  |
| High grade                   | 1.818 (1.149-2.876) | 0.011 | 1.460 (0.916-2.329) | 0.112 | 3.601 (2.339-5.778)   | <0.001 | 2.037 (1.248-3.443)  | 0.006 |  |
| Unknown                      | 1.341 (0.458-3.923) | 0.593 | 0.987 (0.333-2.919) | 0.981 | 1.125 (0.009-8.082)   | 0.935  | 0.495 (0.004-3.768)  | 0.630 |  |
| Pathological T category      |                     |       |                     |       |                       |        |                      |       |  |
| pTis/pTa                     | -                   | -     | -                   | -     | 1 (Ref)               |        | 1 (Ref)              |       |  |
| pT1                          | -                   | -     | -                   | -     | 0.812 (0.347-1.902)   | 0.631  | 0.680 (0.295-1.629)  | 0.375 |  |
| pT2                          | -                   | -     | -                   | -     | 1.761 (0.777-3.989)   | 0.175  | 1.123 (0.501-2.659)  | 0.784 |  |
| pT3                          | -                   | -     | -                   | -     | 4.949 (2.478-9.885)   | <0.001 | 2.773 (1.386-6.130)  | 0.007 |  |
| pT4                          | -                   | -     | -                   | -     | 9.448 (3.508-25.451)  | <0.001 | 5.611 (1.936-15.679) | 0.001 |  |
| Unknown                      | -                   | -     | -                   | -     | -                     | -      | -                    | -     |  |
| Pathological N category      |                     |       |                     |       |                       |        |                      |       |  |
| pNx                          | 1 (Ref)             |       | 1 (Ref)             |       | -                     | -      | -                    | -     |  |
| pN0                          | 0.982 (0.740-1.304) | 0.902 | 0.931 (0.695-       | 0.630 | -                     | -      | -                    | -     |  |

|                       |               |                     |        |                              |        |                     |        |                     |       |
|-----------------------|---------------|---------------------|--------|------------------------------|--------|---------------------|--------|---------------------|-------|
|                       | pN1           | 2.507 (1.812-3.470) | <0.001 | 1.247<br>1.878 (1.325-2.662) | <0.001 | -                   | -      | -                   | -     |
| Concomitant LVI       |               |                     |        |                              |        |                     |        |                     |       |
|                       | No            | 1 (Ref)             |        | 1 (Ref)                      |        | 1 (Ref)             |        | 1 (Ref)             |       |
|                       | Yes           | 2.166 (1.688-2.778) | <0.001 | 1.776 (1.360-2.320)          | <0.001 | 2.801 (1.950-4.022) | <0.001 | 1.494 (1.006-2.200) | 0.046 |
| Concomitant CIS       |               |                     |        |                              |        |                     |        |                     |       |
|                       | No            | 1 (Ref)             |        | -                            | -      | 1 (Ref)             |        | 1 (Ref)             |       |
|                       | Yes           | 1.360 (0.975-1.896) | 0.070  | -                            | -      | 1.958 (1.268-3.024) | 0.002  | 1.393 (0.872-2.155) | 0.152 |
| LN dissection         |               |                     |        |                              |        |                     |        |                     |       |
|                       | Not performed | 1 (Ref)             |        | -                            | -      | -                   | -      | -                   | -     |
|                       | Performed     | 1.290 (1.004-1.657) | 0.046  | -                            | -      | -                   | -      | -                   | -     |
| Adjuvant chemotherapy |               |                     |        |                              |        |                     |        |                     |       |
|                       | No            | 1 (Ref)             |        | -                            | -      | 1 (Ref)             |        | 1 (Ref)             |       |
|                       | Yes           | 1.032 (0.805-1.322) | 0.805  | -                            | -      | 2.210 (1.487-3.284) | <0.001 | 0.822 (0.521-1.274) | 0.394 |

HR, hazard ratio; CI, confidence interval; ONU, open nephroureterectomy; LNU, laparoscopic nephroureterectomy; BMI, body mass index; ASA, American Society of Anesthesiologists; Hx, history; LVI, lymphovascular invasion; CIS, carcinoma in situ; LN, lymph node. <sup>a)</sup>Firth correction for hazard ratio and 95% profile likelihood confidence interval.
